# Supplementary material for: Starch and Sucrose Metabolism and Plant Hormone Signaling Pathways Play Crucial Roles in Aquilegia Salt Stress Adaption
Source: MDPI journal article supplement (doi:10.3390/ijms24043948), 2023-02-16
Supplement: s1 [file s1]

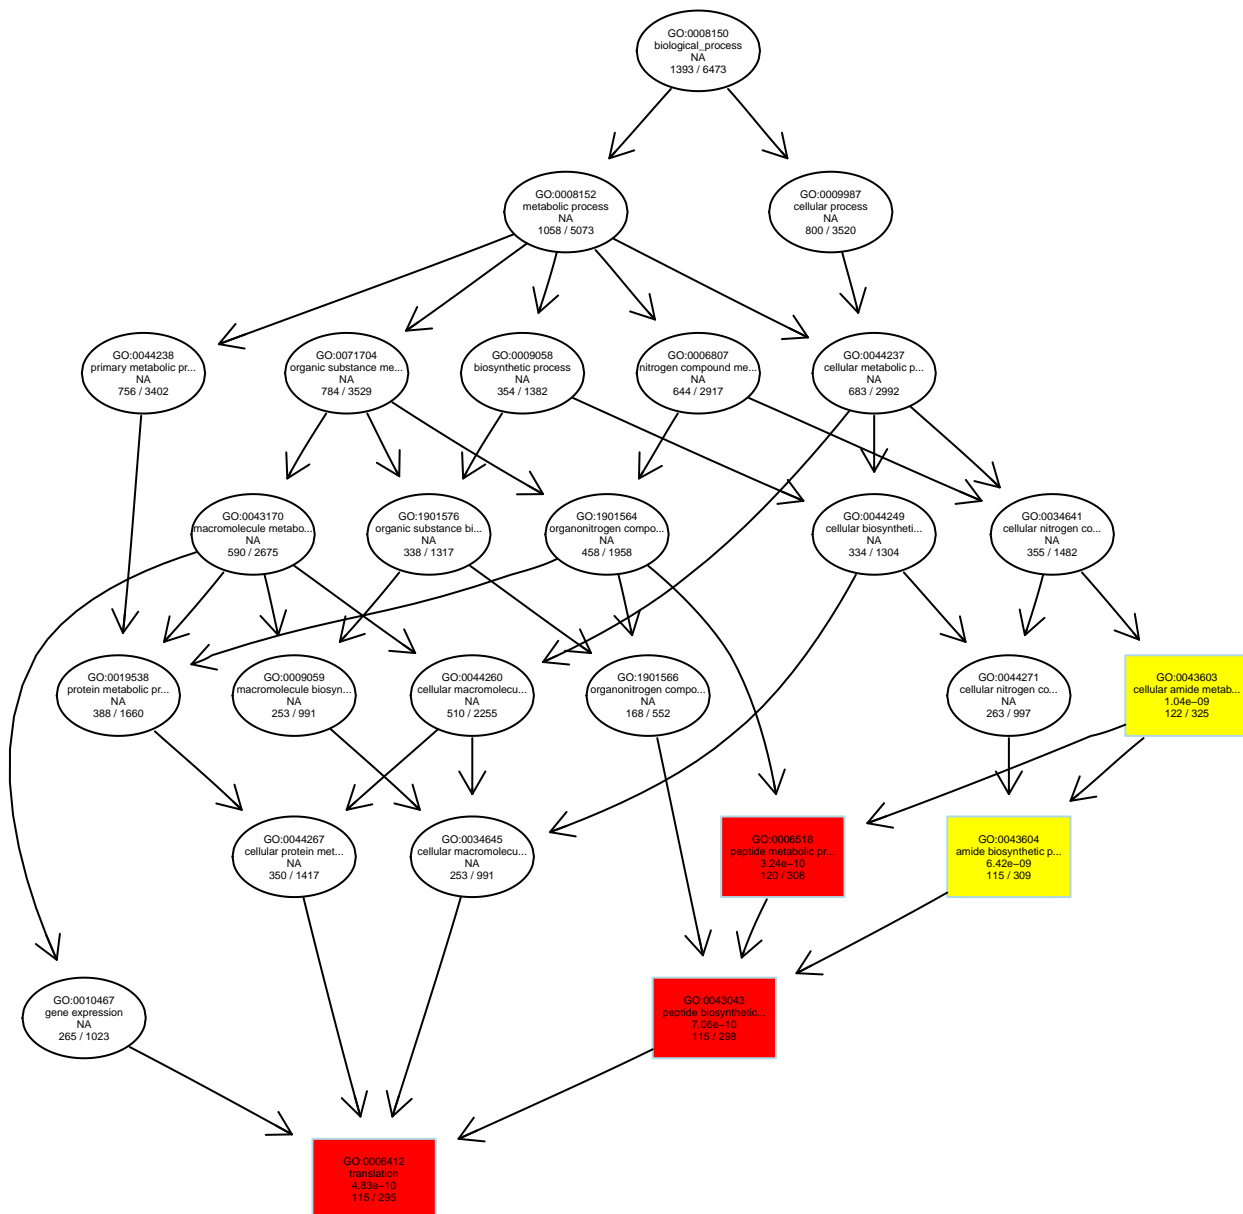

**Figure S3a.** Biological process in GO enrichment of *Aquilegia vulgaris* at 48 h

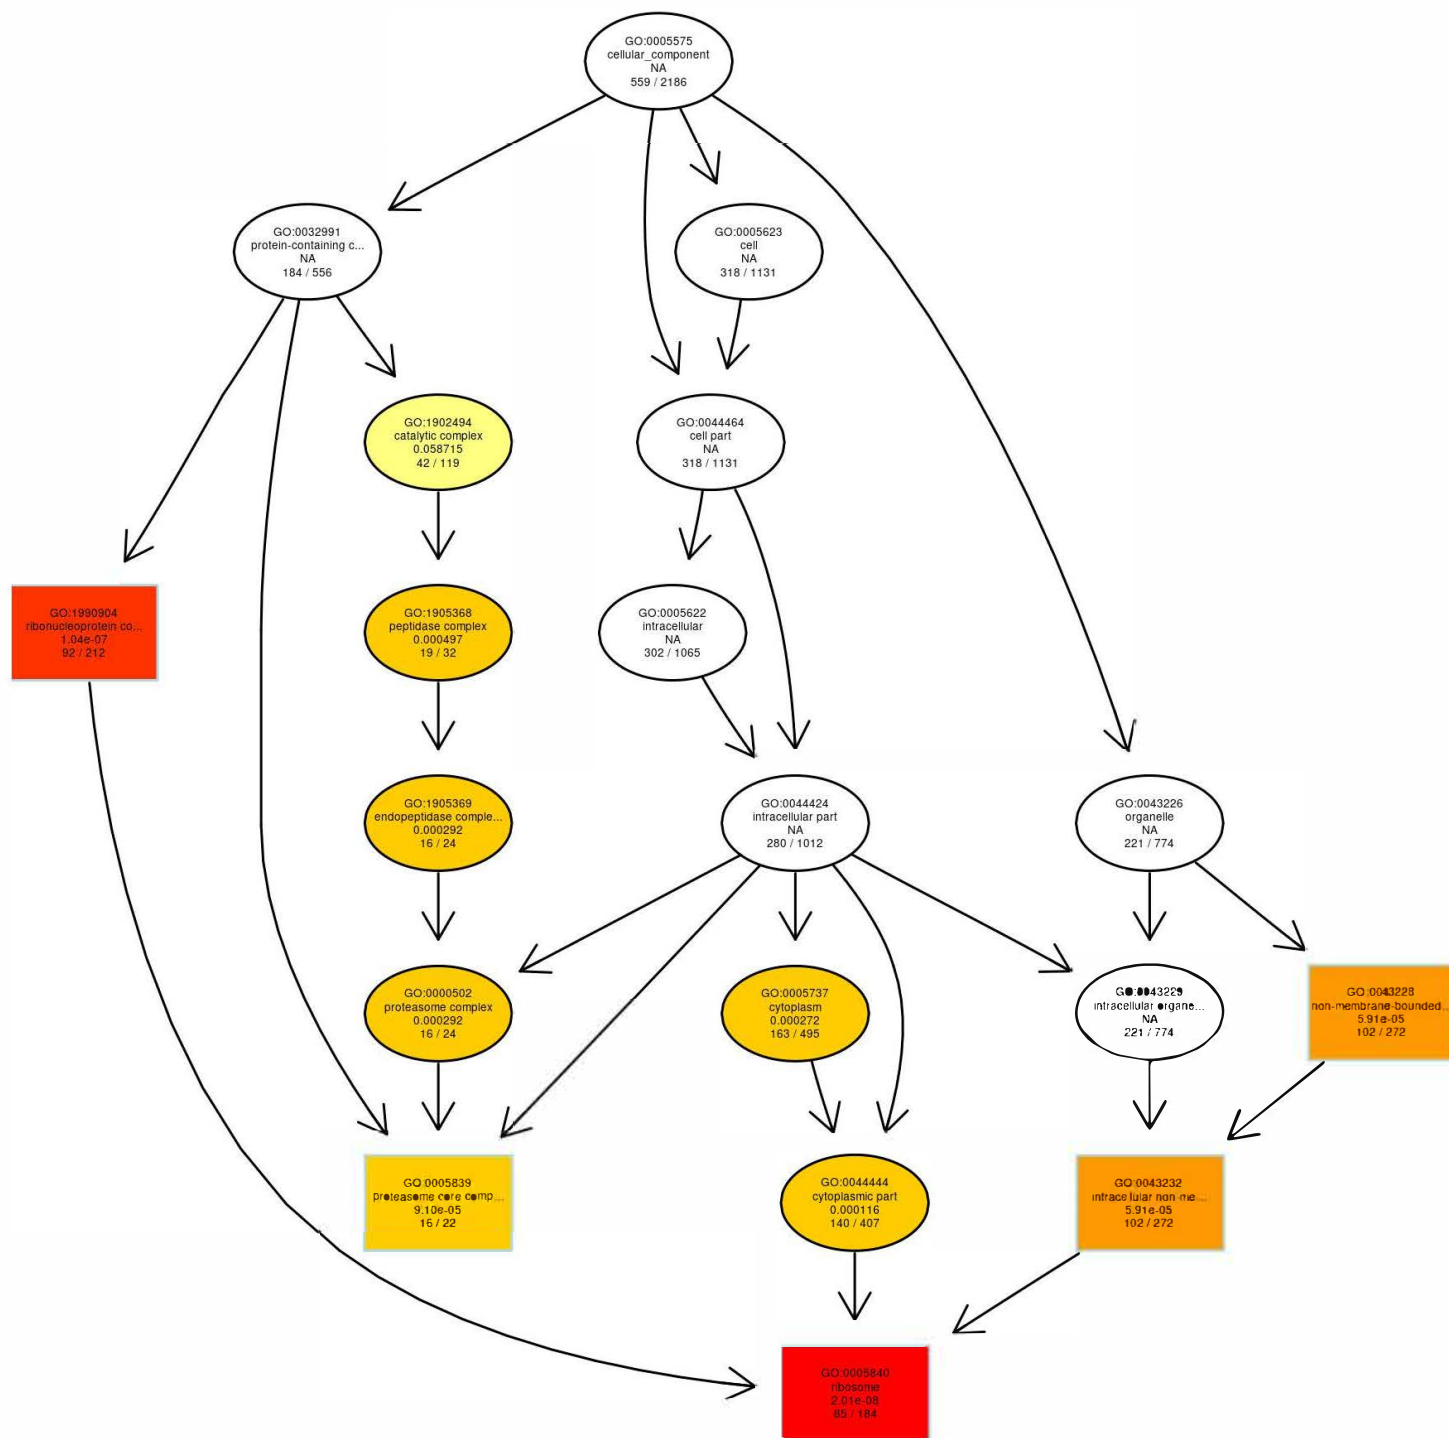

**Figure S3b.** Cellular component in GO enrichment of *Aquilegia vulgaris* at 48 h

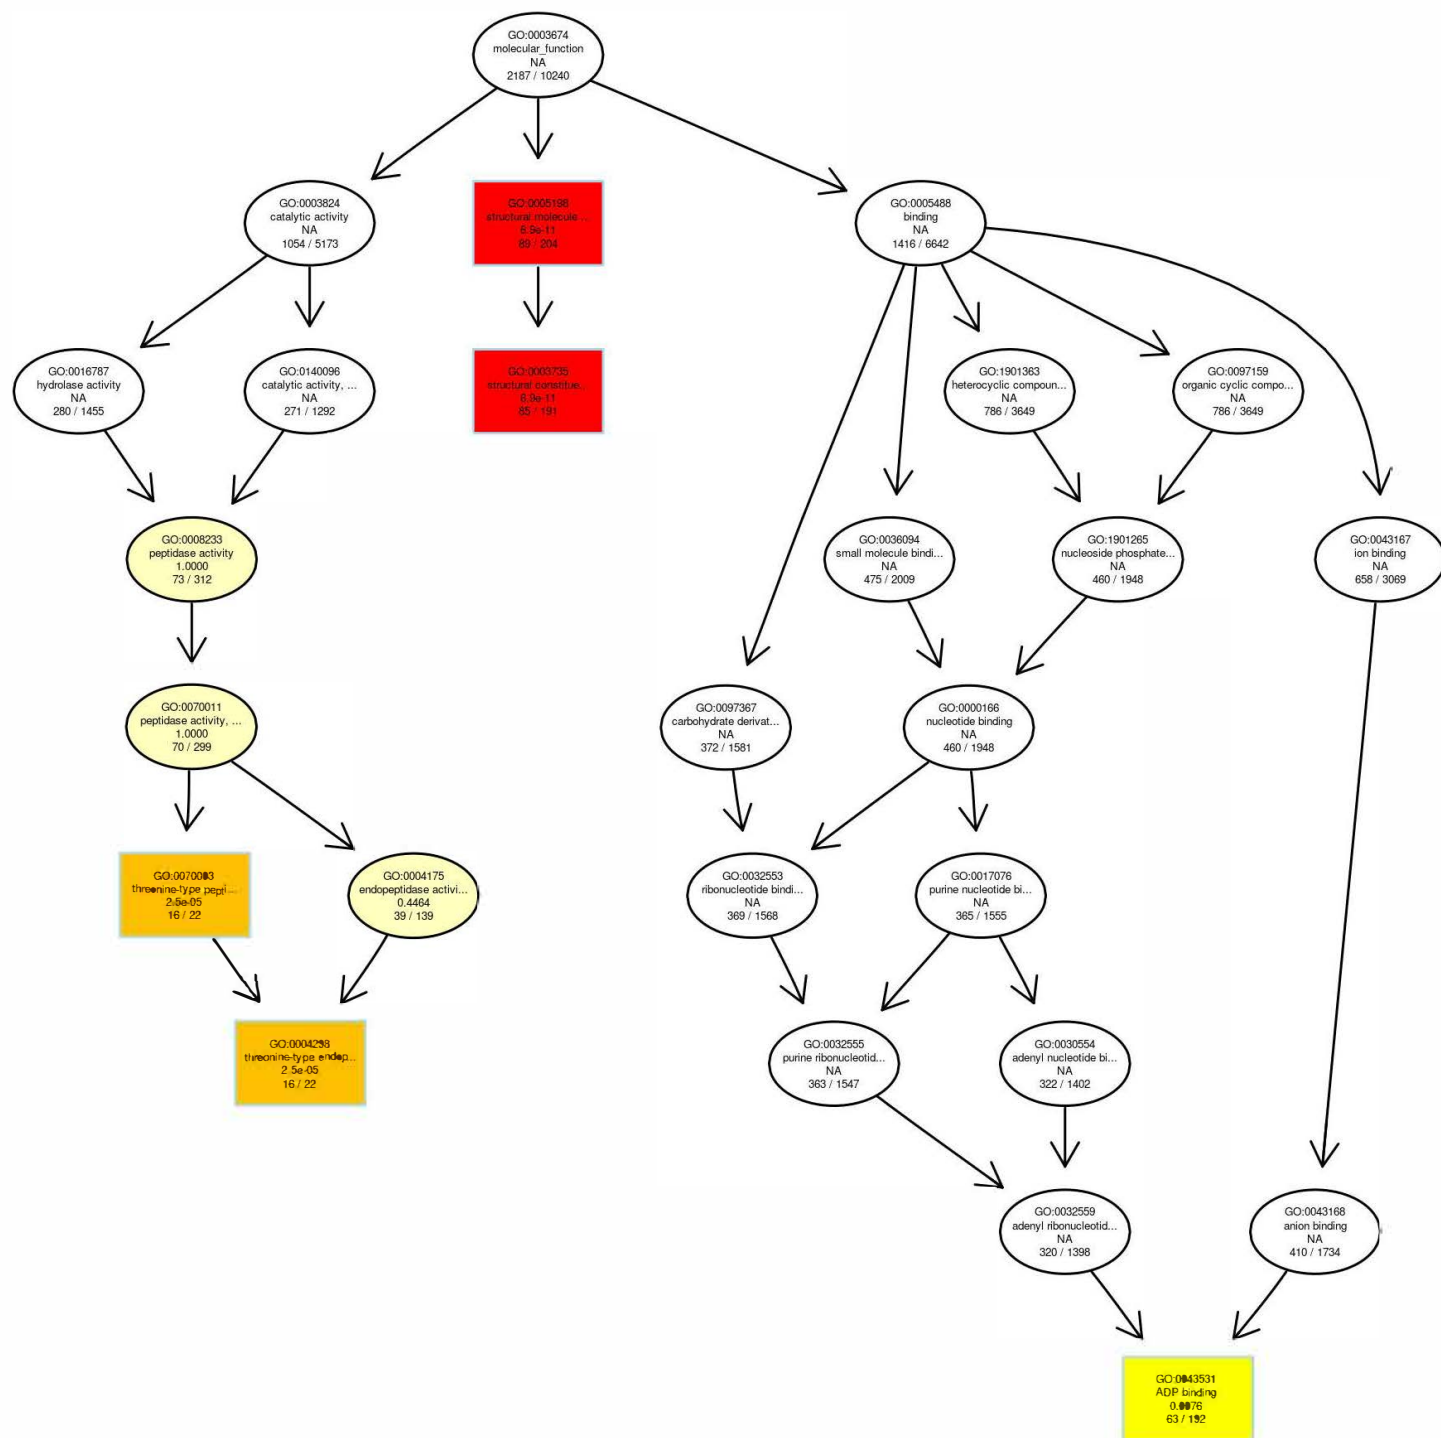

**Figure S3c.** Molecular function in GO enrichment of *Aquilegia vulgaris* at 48 h
