# Supplementary figures and images for: Starch and Sucrose Metabolism and Plant Hormone Signaling Pathways Play Crucial Roles in Aquilegia Salt Stress Adaption
Source: MDPI journal article supplement (doi:10.3390/ijms24043948), 2023-02-16

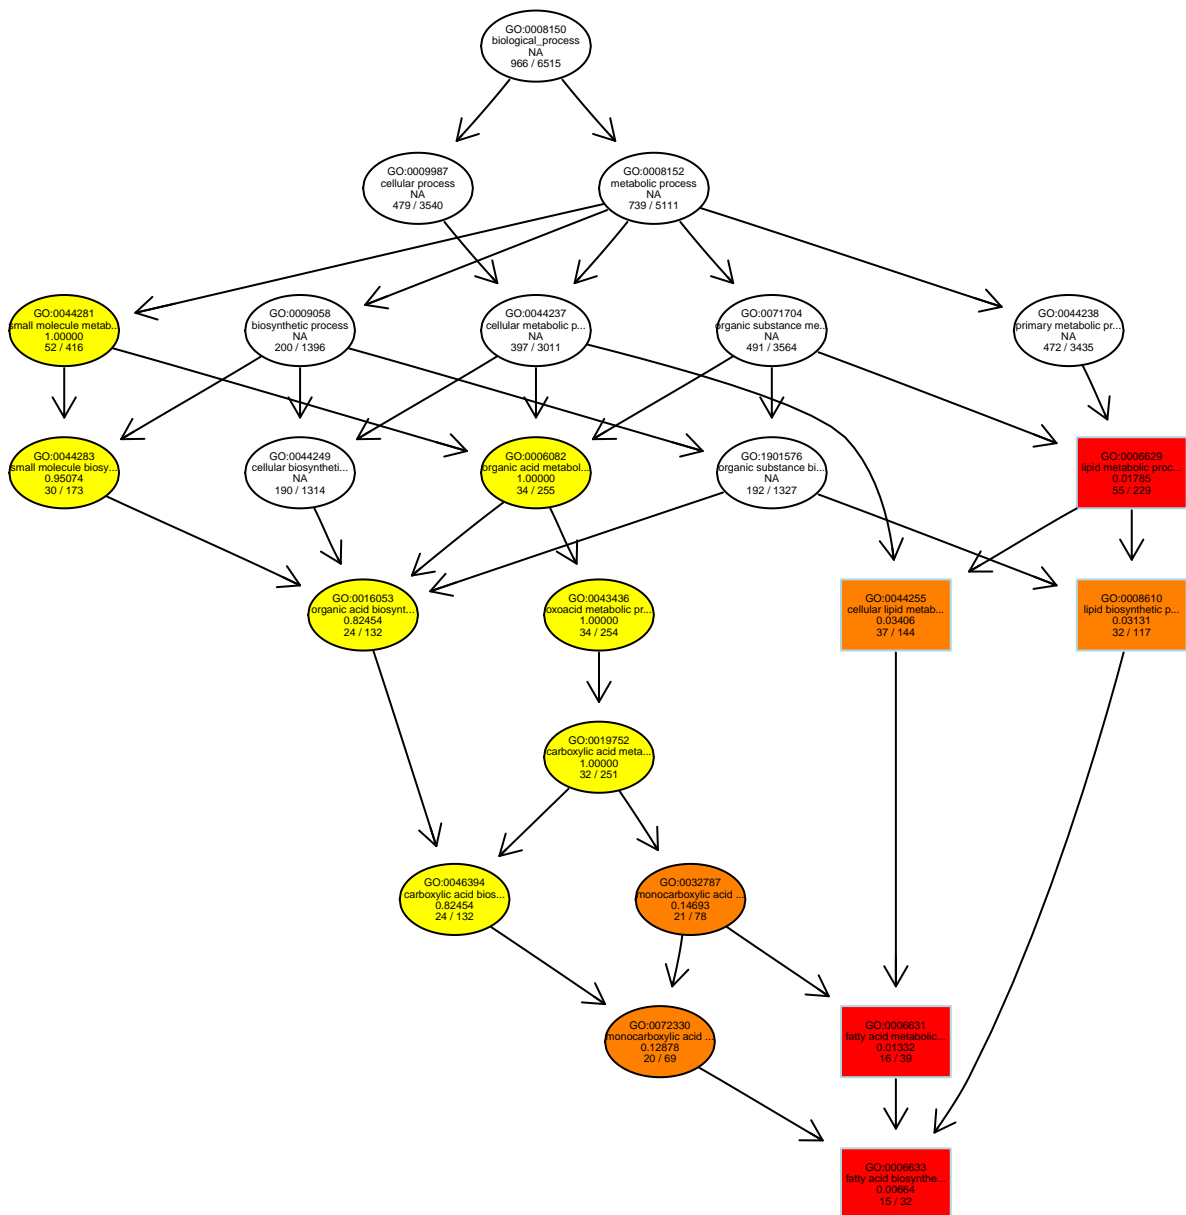



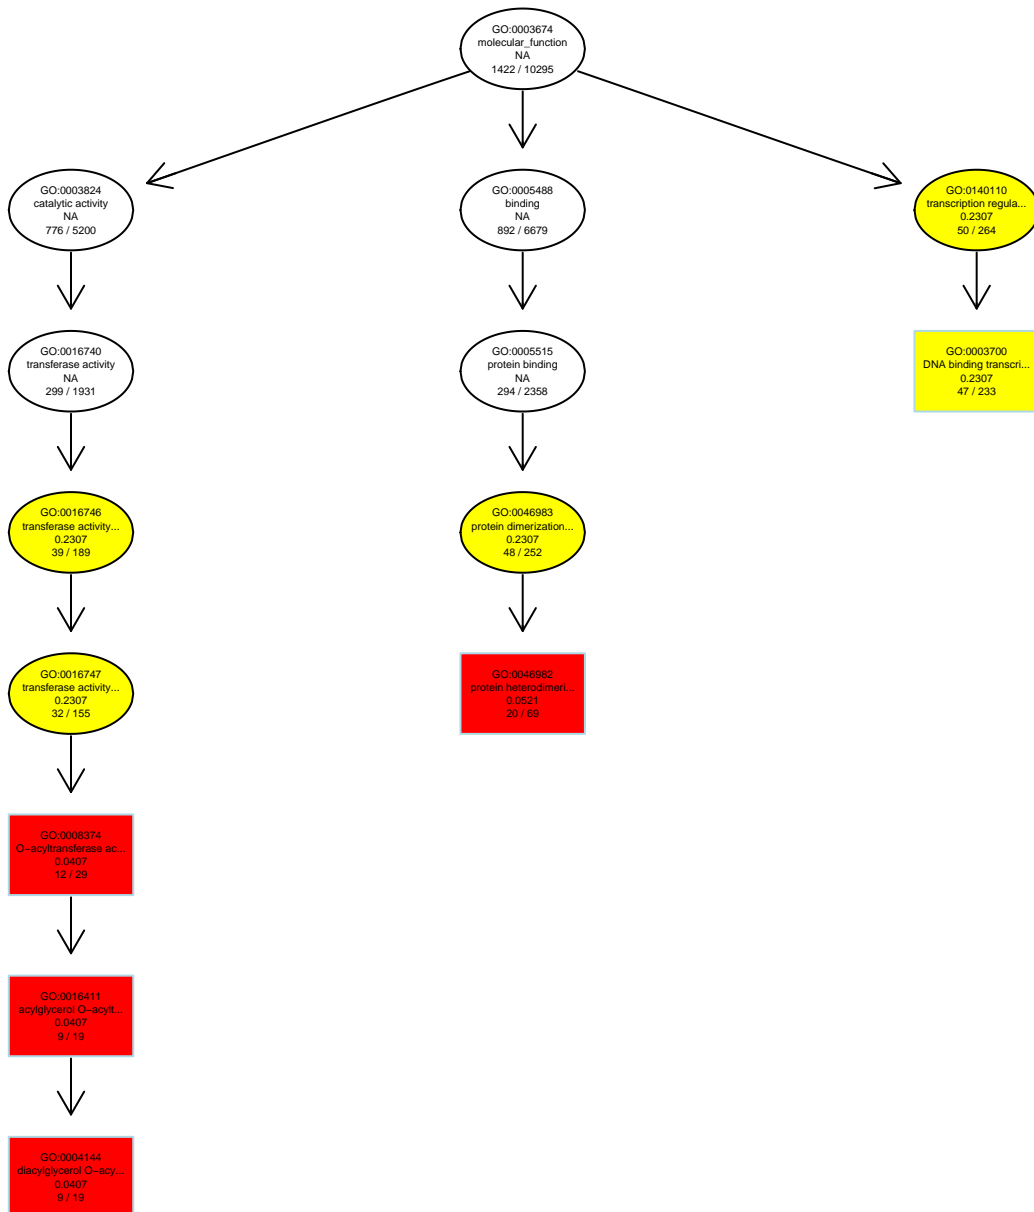

**Figure S1c.** Molecular function in GO enrichment of *Aquilegia vulgaris* at 12 h

Supplement: s1 [file s1]
